# Supplementary material for: Electrical stimulation influences chronic intermittent hypoxia-hypercapnia induction of muscle fibre transformation by regulating the microRNA/Sox6 pathway
Source: PubMed Central journal article supplement (PMC4873781; doi:10.1038/srep26415), 2016-05-20

# Electrical stimulation influences chronic intermittent hypoxia-hypercapnia induction of muscle fibre transformation by regulating the microRNA/Sox6 pathway

Shiyuan Huang<sup>1#</sup>, Lu Jin<sup>1#</sup>, Jie Shen<sup>1</sup>, Ping Shang<sup>1</sup>, Xianxun Jiang<sup>1</sup> and Xiaotong Wang<sup>1\*</sup>.

1. The Centre of Neurology and Rehabilitation, the Second Affiliated Hospital of Wenzhou Medical University, Wenzhou, China.

\*Corresponding author: Wangxt22@163.com

# These authors contributed equally to this work.

Corresponding author: Prof. Xiao-tong Wang. Tel.:+86 13706786183; Fax: +86 576 86666520.

E-mail address:wangxt22@163.com

Address: 109 Xueyuan Road, Wenzhou, Zhejiang; Postcode: 325027, Centre of neurology, the second affiliated hospital of Wenzhou Medical University, Wenzhou, China.

**We use a single membrane instead of the entire membrane to cover each target protein respectively.**

Here are the full-length gel images for Fig.2B, Fig.3A, Fig.4, Fig.6B, Fig.7A and Fig.8.

Fig.2B

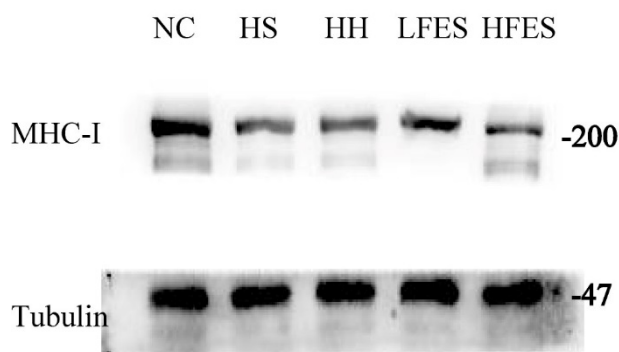

Fig.3A

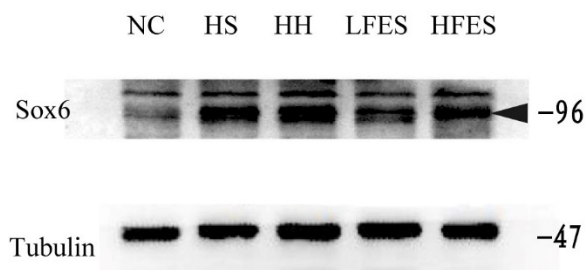

Fig.4

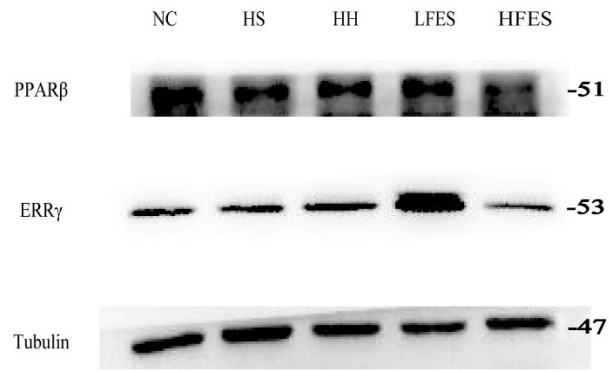

Fig.6B

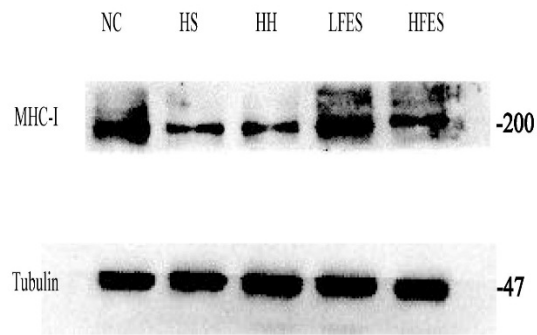

Fig.7A

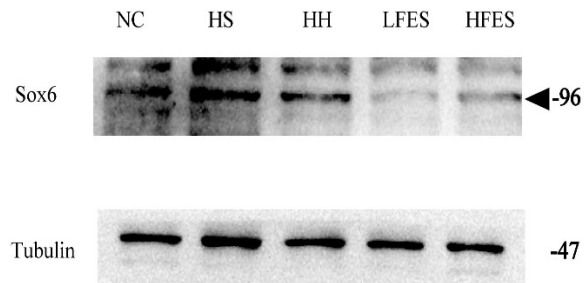

Fig.8

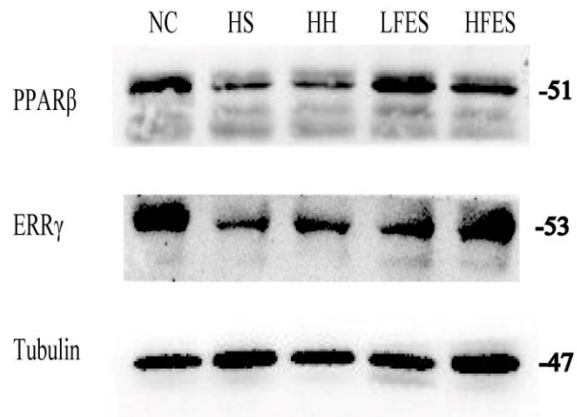

Supplement: srep26415-s1.pdf [file srep26415-s1.pdf]
